# Supplementary material
Source: publisher figshare collection journal article supplement (https://karger.figshare.com/ndownloader/files/28849839)
Supplement: Supplementary file 1 [file 28849839]

Supplemental Table 1. Allele frequencies of variants associated to %HbA1c.

| Gene | SNP | MAF1 | MAF CEU2 | MAF MXL3 | MAF CHB3 |
| --- | --- | --- | --- | --- | --- |
| *ARID5B* | rs7915739 | 0.407 | 0.200 | 0.400 | 0.230 |
| *SLC47A1* | rs2453580 | 0.170 | 0.300 | 0.260 | 0.280 |
| *TBC1D4* | rs9593061 | 0.441 | 0.342 | 0.490 | 0.033 |
| *ABCG2* | rs11723264 | 0.214 | 0.270 | 0.210 | 0.012 |
| *SLC28A1* | rs2290271 | 0.357 | 0.630 | 0.510 | 0.540 |
| *SLC28A1* | rs11073802 | 0.553 | 0.575 | 0.490 | 0.453 |
| *ARID5B* | rs2393781 | 0.418 | 0.470 | 0.430 | 0.330 |
| *ABCG2* | rs6854688 | 0.198 | 0.260 | 0.210 | 0.012 |

1 minor allele frequencies in this study population, 2 minor allele frequencies in Europeans from Utah residents with Northern and Western European ancestry, 3 minor allele frequencies in Mexicans from Los Angeles (USA), 4 minor allele frequencies in Chinese Han from Beijing.
